# Supplementary material
Source: PubMed Central journal article supplement (PMC6768082)
Supplement: NIHMS1533120-supplement-1.pdf [file NIHMS1533120-supplement-1.pdf]

**Supplemental Table 1: Unweighted relative differences in dietary intake<sup>a</sup> by food security status**

|                                | High food security |        | Marginal food security |            | Low food security   |            | Very low food security |            |
|--------------------------------|--------------------|--------|------------------------|------------|---------------------|------------|------------------------|------------|
|                                | RD <sup>b</sup>    | 95% CI | RD <sup>b</sup>        | 95% CI     | RD <sup>b</sup>     | 95% CI     | RD <sup>b</sup>        | 95% CI     |
| Whole grains (oz eq)           | Ref.               | -      | 1.01                   | 0.93, 1.10 | 0.99                | 0.91, 1.08 | 1.01                   | 0.92, 1.10 |
| Fruits (cup eq)                | Ref.               | -      | 0.99                   | 0.92, 1.08 | 0.82 <sup>c,d</sup> | 0.76, 0.89 | 0.82 <sup>c,d</sup>    | 0.75, 0.89 |
| Vegetables (cup eq)            | Ref.               | -      | 1.00                   | 0.95, 1.04 | 0.95                | 0.91, 1.00 | 0.94                   | 0.90, 0.99 |
| Dairy (cup eq)                 | Ref.               | -      | 0.98                   | 0.92, 1.03 | 0.96                | 0.90, 1.01 | 1.02                   | 0.96, 1.08 |
| Added sugar (tsp eq)           | Ref.               | -      | 1.01                   | 0.96, 1.06 | 0.99                | 0.95, 1.04 | 1.03                   | 0.98, 1.09 |
| Added sugar from SSBs (tsp eq) | Ref.               | -      | 1.01                   | 0.94, 1.09 | 1.01                | 0.94, 1.09 | 1.12 <sup>c</sup>      | 1.03, 1.22 |
| Calcium (mg)                   | Ref.               | -      | 0.99                   | 0.97, 1.02 | 0.97                | 0.94, 1.00 | 0.99                   | 0.96, 1.02 |
| Fiber (g)                      | Ref.               | -      | 1.01                   | 0.98, 1.04 | 0.97                | 0.94, 1.00 | 0.97                   | 0.94, 1.00 |

RD, Relative difference

<sup>a</sup> Adjusted for age, sex, race/ethnicity, degree type, first generation college student, and financial aid<sup>b</sup> Relative differences are interpreted as the percentage difference between each group and the reference group (i.e. high food security)<sup>c</sup> Significantly different from high food security after Tukey-Kramer adjustment for multiple comparisons<sup>d</sup> Significantly different from marginal food security after Tukey-Kramer adjustment for multiple comparisons

**Supplemental Table 2: Unweighted least squares means<sup>a</sup> (and standard errors) in BMI and CAFPAS scores by food security status**

|                                      | <b>Total</b> | <b>High food security</b> | <b>Marginal food security</b> | <b>Low food security</b> | <b>Very low food security</b> |
|--------------------------------------|--------------|---------------------------|-------------------------------|--------------------------|-------------------------------|
| BMI                                  | 24.2 (0.2)   | 23.4 (0.3)                | 25.1 (0.4) <sup>b</sup>       | 24.3 (0.4)               | 24.4 (0.5)                    |
| Cooking and food agency <sup>d</sup> | 15.7 (0.1)   | 16.3 (0.1)                | 15.4 (0.2) <sup>b</sup>       | 15.2 (0.2) <sup>b</sup>  | 15.2 (0.2) <sup>b</sup>       |
| Food self-efficacy subscale          | 4.4 (0.03)   | 4.5 (0.1)                 | 4.1 (0.1) <sup>b</sup>        | 4.2 (0.1)                | 4.2 (0.1)                     |
| Food attitudes subscale              | 7.6 (0.03)   | 7.7 (0.1)                 | 7.6 (0.1)                     | 7.5 (0.1)                | 7.6 (0.1)                     |
| Structure subscale                   | 3.8 (0.04)   | 4.1 (0.1)                 | 3.7 (0.1) <sup>b</sup>        | 3.5 (0.1) <sup>b</sup>   | 3.4 (0.1) <sup>b,c</sup>      |

<sup>a</sup> Adjusted for age, sex, race/ethnicity, degree type, first generation college student, and financial aid

<sup>b</sup> Significantly different from high food security

<sup>c</sup> Significantly different from marginal food security

<sup>d</sup> Measured using the Cooking and Food Provisioning Action Scale (CAFPAS), where a higher score indicates higher cooking and food agency
